# Supplementary material for: A hypothesis-driven approach identifies CDK4 and CDK6 inhibitors as candidate drugs for treatments of adrenocortical carcinomas
Source: publisher site journal article supplement (doi:10.18632/aging.101356), 2017-12-26
Supplement: Supplementary file 1 [file aging-v9i12-101356-supplementary-material-SD2.pdf]

Supplemental Table 1

| DNA polymerases |                               | Correlation with MKI-67 |          | Transcription cluster | Relapse Free Survival |            |         |              | Overall Survival |            |          |              |
|-----------------|-------------------------------|-------------------------|----------|-----------------------|-----------------------|------------|---------|--------------|------------------|------------|----------|--------------|
| Gene            | Cellular process              | Correl. Coef            | P-value  |                       | Cutoff                | Percentile | P-value | Adj P-values | Cutoff           | Percentile | P-value  | Adj P-values |
| POLA1           | Replication                   | 0.2333                  | 0.0298   | 4                     | 7.943                 | 27.8       | 0.0046  | 0.0201       | 8.234            | 54.4       | 0.2806   | 0.2826       |
| POLA2           | Replication                   | 0.601                   | 1.11E-09 | 3                     | 8.421                 | 85.2       | 0.0004  | 0.0053       | 8.604            | 79.7       | 1.11E-08 | 6.03E-08     |
| POLD1           | Replication / repair          | 0.697                   | 1.42E-13 | 3                     | 9.09                  | 72.2       | 0.0277  | 0.0516       | 9.09             | 55.7       | 1.81E-09 | 1.29E-08     |
| POLD2           | Replication / repair          | 0.2601                  | 0.01513  | 4                     | 11.79                 | 77.8       | 0.0006  | 0.0069       | 11.64            | 59.5       | 1.84E-05 | 4.10E-05     |
| POLD3           | Replication / repair          | 0.5597                  | 2.29E-08 | 3                     | 8.267                 | 88.9       | 0.0274  | 0.0516       | 8.081            | 72.1       | 7.57E-06 | 1.89E-05     |
| POLD4           | Replication / repair          | -0.2499                 | 0.0197   | 1                     | 11.06                 | 81.5       | 0.0204  | 0.0428       | 9.785            | 11.4       | 0.0003   | 0.0006       |
| POLE            | Replication / repair          | 0.431                   | 3.36E-05 | 3                     | 9.588                 | 74.1       | 0.1009  | 0.1172       | 9.842            | 78.5       | 0.0003   | 0.0005       |
| POLE2           | Replication / repair          | 0.7138                  | 2.07E-14 | 3                     | 4.891                 | 68.5       | 0.0015  | 0.0125       | 6.211            | 75.9       | 1.92E-08 | 8.73E-08     |
| POLE3           | Replication / repair          | 0.4681                  | 5.48E-06 | 4                     | 10.3                  | 44.4       | 0.0001  | 0.0032       | 10.5             | 45.6       | 0.0001   | 0.0002       |
| POLE4           | Replication / repair          | 0.2168                  | 0.04387  | 4                     | 8.512                 | 18.5       | 0.0319  | 0.0538       | 9.55             | 73.4       | 0.0052   | 0.0075       |
| POLB            | Replication / repair          | 0.0238                  | 0.8268   | 4                     | 7.692                 | 9.3        | 0.1461  | 0.1629       | 8.705            | 77.2       | 0.0010   | 0.0018       |
| POLG            | Mitochondrial DNA replication | 0.2232                  | 0.0379   | 4                     | 9.568                 | 46.3       | 0.0038  | 0.0190       | 9.893            | 53.2       | 0.0001   | 0.0002       |
| POLG2           | Mitochondrial DNA replication | 0.1385                  | 0.2010   | 2                     | 7.394                 | 88.9       | 0.0058  | 0.0234       | 7.27             | 87.3       | 0.0240   | 0.0303       |
| POLL            | Replication / repair          | -0.06111                | 0.5738   | 1                     | 9.842                 | 81.5       | 0.0128  | 0.0352       | 9.327            | 45.6       | 0.1071   | 0.1165       |
| POLM            | Replication / repair          | -0.1761                 | 0.1029   | 1                     | 8.136                 | 11.1       | 0.0336  | 0.0544       | 8.087            | 12.7       | 0.1581   | 0.1629       |
| POLQ            | Replication / repair          | 0.7578                  | 0.0000   | 3                     | 6.071                 | 68.5       | 0.0039  | 0.0190       | 6.25             | 57.0       | 9.49E-09 | 5.38E-08     |
| POLN            | Translesion DNA synthesis     | -0.2193                 | 0.04144  | 1                     | 4.365                 | 20.4       | 0.0020  | 0.0123       | 3.837            | 15.2       | 1.95E-05 | 4.27E-05     |
| REV3L           | Translesion DNA synthesis     | 0.149                   | 0.1685   | 2                     | 8.224                 | 29.6       | 0.1252  | 0.1408       | 9.295            | 86.1       | 0.0024   | 0.0039       |
| MAD2L2          | Translesion DNA synthesis     | 0.4611                  | 7.86E-06 | 3                     | 9.38                  | 88.9       | 0.0259  | 0.0503       | 9.438            | 79.7       | 2.12E-10 | 1.81E-09     |
| REV1            | Translesion DNA synthesis     | 0.2021                  | 0.0606   | 1                     | 9.479                 | 44.4       | 0.0122  | 0.0352       | 10.22            | 77.2       | 7.64E-06 | 1.89E-05     |
| POLK            | Translesion DNA synthesis     | -0.1658                 | 0.1250   | 1                     | 9.145                 | 29.6       | 0.0008  | 0.0075       | 8.899            | 26.6       | 1.26E-05 | 2.90E-05     |
| POLH            | Translesion DNA synthesis     | 0.3561                  | 0.0007   | 4                     | 9.01                  | 48.1       | 0.0397  | 0.0623       | 9.362            | 73.4       | 0.0829   | 0.0924       |
| POLI            | Translesion DNA synthesis     | -0.003165               | 0.9768   | 1                     | 8.54                  | 53.7       | 0.0565  | 0.0768       | 8.058            | 26.6       | 0.0583   | 0.0677       |

| G1/S checkpoint |                          | Correlation with MKI-67 |          | Transcription cluster | Time to relapse |            |          |                 | Overall Survival |            |          |                 |
|-----------------|--------------------------|-------------------------|----------|-----------------------|-----------------|------------|----------|-----------------|------------------|------------|----------|-----------------|
| Gene            | Cellular process         | Correl. Coef            | P-value  |                       | Cutoff          | Percentile | P-value  | Adj P-values    | Cutoff           | Percentile | P-value  | Adj P-values    |
| CDK2            | CDK and their regulators | 0.6564                  | 9.18E-12 | 3                     | 9.233           | 64.8       | 0.0527   | 0.0731          | 9.526            | 63.3       | 2.36E-07 | <b>8.22E-07</b> |
| CDK4            | CDK and their regulators | 0.1335                  | 0.2178   | 4                     | 12.63           | 68.5       | 0.2822   | 0.2864          | 11.29            | 10.1       | 0.2477   | 0.2533          |
| CDK6            | CDK and their regulators | 0.1239                  | 0.2529   | 2                     | 10.63           | 79.6       | 5.12E-08 | <b>6.97E-06</b> | 10.74            | 69.6       | 1.79E-05 | <b>4.05E-05</b> |
| CDKN2A          | CDK and their regulators | 0.2599                  | 0.0152   | 4                     | 7.55            | 31.5       | 0.0848   | 0.1041          | 10.29            | 87.3       | 3.72E-05 | <b>7.90E-05</b> |
| CDKN2B          | CDK and their regulators | 0.1209                  | 0.2645   | 2                     | 7.09            | 29.6       | 0.0031   | <b>0.0169</b>   | 8.264            | 75.9       | 0.0025   | <b>0.0039</b>   |
| CDKN2C          | CDK and their regulators | 0.3                     | 0.0049   | 4                     | 9.428           | 37.0       | 0.0258   | 0.0503          | 10.85            | 88.6       | 0.0156   | <b>0.0204</b>   |
| CDKN2D          | CDK and their regulators | 0.4078                  | 9.45E-05 | 4                     | 8.713           | 18.5       | 0.0334   | 0.0544          | 10.39            | 74.7       | 0.0003   | <b>0.0006</b>   |
| CDKN1A          | CDK and their regulators | -0.2559                 | 0.0169   | 1                     | 11.32           | 11.1       | 0.0117   | <b>0.0352</b>   | 10.07            | 10.1       | 8.60E-06 | <b>2.09E-05</b> |
| CDKN1B          | CDK and their regulators | -0.05606                | 0.6059   | 1                     | 11.36           | 66.7       | 0.1775   | 0.1916          | 10.52            | 15.2       | 0.0822   | 0.0924          |
| CDKN1C          | CDK and their regulators | -0.2749                 | 0.0101   | 1                     | 8.325           | 48.1       | 0.0759   | 0.0973          | 10.03            | 73.4       | 0.0282   | <b>0.0349</b>   |
| CCND1           | CDK and their regulators | 0.02788                 | 0.7976   | 1                     | 12.53           | 87.0       | 0.0266   | 0.0510          | 12.66            | 81.0       | 0.0038   | <b>0.0056</b>   |
| CCND2           | CDK and their regulators | -0.3974                 | 0.0001   | 1                     | 13.99           | 77.8       | 0.0129   | <b>0.0352</b>   | 10.13            | 12.7       | 4.62E-06 | <b>1.26E-05</b> |
| CCND3           | CDK and their regulators | -0.09043                | 0.4048   | 1                     | 12.23           | 24.1       | 0.0896   | 0.1060          | 12.55            | 45.6       | 0.0010   | <b>0.0017</b>   |
| CCNE1           | CDK and their regulators | 0.3751                  | 0.0004   | 3                     | 9.74            | 74.1       | 0.0208   | <b>0.0428</b>   | 9.923            | 73.4       | 0.0022   | <b>0.0037</b>   |
| HDAC1           | pRb1 pathway             | 0.1997                  | 0.0639   | 4                     | 11.03           | 48.1       | 0.0164   | <b>0.0399</b>   | 10.31            | 12.7       | 0.0102   | <b>0.0140</b>   |
| HDAC2           | pRb1 pathway             | 0.2628                  | 0.0141   | 4                     | 10.66           | 51.9       | 0.0399   | 0.0623          | 11.28            | 79.7       | 0.0006   | <b>0.0011</b>   |
| HDAC3           | pRb1 pathway             | -0.01198                | 0.9123   | 2                     | 10.81           | 72.2       | 0.3039   | 0.3039          | 11               | 86.1       | 0.0665   | 0.0767          |
| RB1             | pRb1 pathway             | -0.1955                 | 0.0698   | 1                     | 9.334           | 13.0       | 0.0076   | <b>0.0285</b>   | 9.899            | 29.1       | 0.0556   | 0.0652          |
| RBL1            | pRb1 pathway             | 0.4255                  | 0.0000   | 4                     | 5.371           | 20.4       | 0.0185   | <b>0.0419</b>   | 6.364            | 54.4       | 0.0111   | <b>0.0150</b>   |
| RBL2            | pRb1 pathway             | -0.3227                 | 0.0024   | 1                     | 10.19           | 16.7       | 0.0115   | <b>0.0352</b>   | 10.1             | 26.6       | 2.85E-05 | <b>6.15E-05</b> |
| E2F1            | pRb1 pathway             | 0.5798                  | 5.55E-09 | 3                     | 9.458           | 63.0       | 0.0321   | 0.0538          | 9.533            | 58.2       | 3.31E-07 | <b>1.10E-06</b> |
| E2F2            | pRb1 pathway             | 0.8433                  | 0        | 3                     | 5.708           | 64.8       | 0.0003   | <b>0.0047</b>   | 6.172            | 55.7       | 2.23E-07 | <b>7.99E-07</b> |
| E2F3            | pRb1 pathway             | 0.1764                  | 0.1024   | 2                     | 9.201           | 87.0       | 0.0130   | <b>0.0352</b>   | 7.804            | 11.4       | 0.1264   | 0.1364          |
| E2F4            | pRb1 pathway             | 0.1165                  | 0.2827   | 1                     | 10.96           | 61.1       | 0.0217   | <b>0.0440</b>   | 10.77            | 40.5       | 0.1294   | 0.1375          |
| E2F5            | pRb1 pathway             | 0.08457                 | 0.4360   | 2                     | 5.532           | 20.4       | 0.0411   | 0.0636          | 7.213            | 84.8       | 0.0107   | <b>0.0146</b>   |
| TFDP1           | pRb1 pathway             | 0.5205                  | 2.89E-07 | 4                     | 9.222           | 46.3       | 0.0012   | <b>0.0109</b>   | 9.832            | 63.3       | 1.19E-07 | <b>4.64E-07</b> |
| TFDP2           | pRb1 pathway             | -0.007805               | 0.9428   | 2                     | 8.354           | 72.2       | 0.0049   | <b>0.0209</b>   | 7.35             | 13.9       | 0.1284   | 0.1375          |

| DNA replication |                                   | Correlation with MKI-67 |          | Transcription cluster | Time to relapse |            |          |               | Overall Survival |            |          |                 |
|-----------------|-----------------------------------|-------------------------|----------|-----------------------|-----------------|------------|----------|---------------|------------------|------------|----------|-----------------|
| Gene            | Cellular process                  | Correl. Coef            | P-value  |                       | Cutoff          | Percentile | P-value  | Adj P-values  | Cutoff           | Percentile | P-value  | Adj P-values    |
| CDC6            | Pre-replication complex           | 0.6909                  | 2.78E-13 | 3                     | 6.618           | 18.5       | 0.1153   | 0.1317        | 8.232            | 67.1       | 4.36E-11 | <b>4.56E-10</b> |
| CDT1            | Pre-replication complex           | 0.799                   | 0        | 3                     | 7.727           | 53.7       | 6.87E-06 | <b>0.0003</b> | 8.636            | 58.2       | 1.39E-08 | <b>7.29E-08</b> |
| GMNN            | Pre-replication complex formation | 0.5515                  | 4.02E-08 | 3                     | 9.023           | 79.6       | 0.0188   | <b>0.0419</b> | 9.418            | 81.0       | 4.90E-06 | <b>1.27E-05</b> |
| ORC1L           | Pre-replication complex           | 0.8265                  | 0        | 3                     | 4.27            | 35.2       | 0.0179   | <b>0.0419</b> | 5.709            | 65.8       | 2.33E-12 | <b>4.53E-11</b> |
| ORC2L           | Pre-replication complex           | 0.137                   | 0.2056   | 2                     | 8.245           | 77.8       | 0.0040   | <b>0.0190</b> | 8.577            | 84.8       | 2.69E-05 | <b>5.91E-05</b> |
| ORC3L           | Pre-replication complex           | -0.09642                | 0.3742   | 1                     | 8.879           | 13.0       | 0.0869   | 0.1055        | 10.12            | 87.3       | 0.1356   | 0.1418          |
| ORC4L           | Pre-replication complex           | -0.05241                | 0.6296   | 2                     | 8.576           | 29.6       | 0.0104   | <b>0.0352</b> | 9.099            | 75.9       | 0.0518   | 0.0612          |
| ORC5L           | Pre-replication complex           | 0.1365                  | 0.2076   | 2                     | 8.235           | 16.7       | 0.2891   | 0.2912        | 9.51             | 88.6       | 0.0043   | <b>0.0063</b>   |
| ORC6L           | Pre-replication complex           | 0.5775                  | 6.56E-09 | 3                     | 6.859           | 31.5       | 0.1595   | 0.1764        | 7.249            | 39.2       | 6.61E-05 | <b>0.0001</b>   |
| MCM2            | Pre-replication complex           | 0.6644                  | 4.22E-12 | 3                     | 8.327           | 33.3       | 0.0182   | <b>0.0419</b> | 9.538            | 68.4       | 9.34E-08 | <b>3.74E-07</b> |
| MCM3            | Pre-replication complex           | 0.6724                  | 1.91E-12 | 3                     | 10.71           | 64.8       | 0.0007   | <b>0.0073</b> | 10.84            | 67.1       | 1.28E-06 | <b>3.95E-06</b> |
| MCM4            | Pre-replication complex           | 0.5926                  | 2.13E-09 | 3                     | 10.35           | 87.0       | 6.92E-05 | <b>0.0024</b> | 9.63             | 51.9       | 0.0019   | <b>0.0032</b>   |
| MCM5            | Pre-replication complex           | 0.7685                  | 0        | 3                     | 8.481           | 20.4       | 0.0135   | <b>0.0353</b> | 9.854            | 72.2       | 3.84E-12 | <b>6.54E-11</b> |
| MCM6            | Pre-replication complex           | 0.7319                  | 2.22E-15 | 3                     | 9.488           | 74.1       | 0.0182   | <b>0.0419</b> | 9.835            | 70.9       | 9.45E-12 | <b>1.07E-10</b> |
| MCM7            | Pre-replication complex           | 0.7683                  | 0        | 3                     | 9.544           | 31.5       | 0.0724   | 0.0937        | 10.64            | 68.4       | 1.59E-08 | <b>7.71E-08</b> |
| CDC7            | Initiation of DNA replication     | 0.7383                  | 8.88E-16 | 3                     | 7.835           | 87.0       | 0.0388   | 0.0621        | 7.224            | 59.5       | 5.03E-09 | <b>3.26E-08</b> |
| CDC45           | Initiation of DNA replication     | 0.8867                  | 0        | 3                     | 4.76            | 38.9       | 0.0001   | <b>0.0032</b> | 6.869            | 64.6       | 1.92E-12 | <b>4.36E-11</b> |
| DBF4            | Initiation of DNA replication     | 0.5082                  | 6.02E-07 | 4                     | 8.057           | 85.2       | 0.0019   | <b>0.0125</b> | 8.242            | 78.5       | 2.65E-08 | <b>1.16E-07</b> |
| MCM10           | Initiation of DNA replication     | 0.8755                  | 0        | 3                     | 3.969           | 27.8       | 0.0077   | <b>0.0285</b> | 6.271            | 69.6       | 3.03E-14 | <b>1.37E-12</b> |
| GIN51           | Initiation of DNA replication     | 0.6637                  | 4.55E-12 | 3                     | 8.318           | 85.2       | 0.0330   | 0.0544        | 7.97             | 64.6       | 1.34E-07 | <b>5.06E-07</b> |
| GIN52           | Initiation of DNA replication     | 0.6816                  | 7.40E-13 | 3                     | 6.921           | 31.5       | 0.0534   | 0.0733        | 9.17             | 86.1       | 6.73E-11 | <b>6.53E-10</b> |
| GIN53           | Initiation of DNA replication     | 0.01906                 | 0.8609   | 1                     | 9.355           | 57.4       | 0.0819   | 0.1032        | 8.902            | 41.8       | 0.0024   | <b>0.0038</b>   |
| GIN54           | Initiation of DNA replication     | 0.6338                  | 7.28E-11 | 3                     | 6.987           | 57.4       | 0.0018   | <b>0.0125</b> | 7.365            | 59.5       | 1.72E-06 | <b>5.21E-06</b> |

|       |                               |          |          |   |       |      |        |               |       |      |          |                 |
|-------|-------------------------------|----------|----------|---|-------|------|--------|---------------|-------|------|----------|-----------------|
| WDHD1 | Initiation of DNA replication | 0.6982   | 1.24E-13 | 3 | 5.919 | 24.1 | 0.0308 | 0.0531        | 7.529 | 74.7 | 3.07E-06 | <b>8.89E-06</b> |
| FEN1  | DNA replication               | 0.6892   | 3.32E-13 | 3 | 8.774 | 38.9 | 0.0002 | <b>0.0040</b> | 9.846 | 74.7 | 6.69E-09 | <b>3.96E-08</b> |
| LIG1  | DNA replication               | 0.623    | 1.83E-10 | 3 | 9.923 | 79.6 | 0.0153 | <b>0.0378</b> | 9.923 | 65.8 | 2.05E-07 | <b>7.52E-07</b> |
| PCNA  | DNA replication               | 0.4114   | 8.12E-05 | 3 | 10.7  | 38.9 | 0.0462 | 0.0675        | 11.09 | 55.7 | 0.0295   | <b>0.0361</b>   |
| RFC1  | DNA replication               | 0.007875 | 0.9423   | 1 | 9.625 | 7.4  | 0.0478 | 0.0684        | 10.95 | 83.5 | 0.0792   | 0.0898          |
| RPA1  | DNA replication               | 0.04381  | 0.6869   | 2 | 10.38 | 44.4 | 0.0286 | 0.0522        | 9.82  | 12.7 | 0.0791   | 0.0898          |
| RPA2  | DNA replication               | 0.283    | 0.0080   | 4 | 10.17 | 85.2 | 0.0142 | <b>0.0357</b> | 10.36 | 82.3 | 0.0240   | <b>0.0303</b>   |
| RPA3  | DNA replication               | 0.2234   | 0.0377   | 4 | 9.632 | 85.2 | 0.1721 | 0.1873        | 9.647 | 87.3 | 0.0014   | <b>0.0024</b>   |
| RPA4  | DNA replication               | 0.1688   | 0.1182   | 2 | 1.198 | 46.3 | 0.2508 | 0.2584        | 2.079 | 88.6 | 0.1499   | 0.1556          |
| TICRR | DNA replication               | 0.7778   | 0        | 3 | 5.99  | 79.6 | 0.0021 | <b>0.0130</b> | 6.736 | 68.4 | 5.71E-12 | <b>8.63E-11</b> |
| TOP1  | Topoisomerase                 | -0.03081 | 0.7769   | 1 | 10.86 | 25.9 | 0.0090 | <b>0.0314</b> | 10.55 | 19.0 | 0.0146   | <b>0.0195</b>   |
| TOP2A | Topoisomerase                 | 0.9284   | 0        | 3 | 7.097 | 20.4 | 0.0194 | <b>0.0419</b> | 9.946 | 69.6 | 6.80E-12 | <b>9.25E-11</b> |

| S phase checkpoint |                                        | Correlation with MKI-67 |          |        | Time to relapse |         |              |                 | Overall Survival |         |              |                 |
|--------------------|----------------------------------------|-------------------------|----------|--------|-----------------|---------|--------------|-----------------|------------------|---------|--------------|-----------------|
| Gene               | Cellular process                       | Correl. Coef            | P-value  | Cutoff | Percentile      | P-value | Adj P-values | Cutoff          | Percentile       | P-value | Adj P-values |                 |
| ATR                | ATR + Rad17-9-1-1 DNA damage sensors   | 0.06289                 | 0.5627   | 1      | 10.57           | 85.2    | 0.0423       | 0.0644          | 10.38            | 70.9    | 0.1355       | 0.1418          |
| ATRIP              | ATR + Rad17-9-1-1 DNA damage sensors   | -0.07991                | 0.4618   | 2      | 8.318           | 87.0    | 0.0932       | 0.1093          | 7.658            | 31.6    | 0.2645       | 0.2684          |
| HUS1               | ATR + Rad17-9-1-1 DNA damage sensors   | -0.02332                | 0.8302   | 1      | 7.75            | 13.0    | 0.0044       | <b>0.0200</b>   | 8.911            | 72.2    | 0.0361       | <b>0.0430</b>   |
| RAD1               | ATR + Rad17-9-1-1 DNA damage sensors   | 0.3105                  | 0.003495 | 4      | 10.01           | 70.4    | 0.0016       | <b>0.0125</b>   | 9.695            | 46.8    | 0.0269       | <b>0.0336</b>   |
| RAD17              | ATR + Rad17-9-1-1 DNA damage sensors   | -0.132                  | 0.2229   | 1      | 9.195           | 25.9    | 0.0477       | 0.0684          | 9.471            | 49.4    | 0.0005       | <b>0.0008</b>   |
| RAD9A              | ATR + Rad17-9-1-1 DNA damage sensors   | 0.2789                  | 0.009017 | 4      | 8.111           | 50.0    | 0.0126       | <b>0.0352</b>   | 8.014            | 35.4    | 0.0034       | <b>0.0051</b>   |
| RFC2               | ATR + Rad17-9-1-1 DNA damage sensors   | 0.6268                  | 1.33E-10 | 3      | 9.459           | 88.9    | 0.0884       | 0.1060          | 9.473            | 79.7    | 1.45E-08     | <b>7.29E-08</b> |
| RFC3               | ATR + Rad17-9-1-1 DNA damage sensors   | 0.5021                  | 8.58E-07 | 4      | 9.388           | 88.9    | 0.0019       | <b>0.0125</b>   | 8.922            | 58.2    | 2.72E-06     | <b>8.03E-06</b> |
| RFC4               | ATR + Rad17-9-1-1 DNA damage sensors   | 0.586                   | 3.51E-09 | 3      | 7.382           | 24.1    | 0.0656       | 0.0867          | 8.651            | 79.7    | 5.18E-08     | <b>2.20E-07</b> |
| RFC5               | ATR + Rad17-9-1-1 DNA damage sensors   | 0.5417                  | 7.68E-08 | 3      | 7.937           | 25.9    | 0.0583       | 0.0785          | 8.392            | 51.9    | 0.0001       | <b>0.0002</b>   |
| ATM                | ATM - MRN DNA damage sensors           | -0.2387                 | 0.02613  | 1      | 9.833           | 57.4    | 0.0596       | 0.0795          | 9.661            | 40.5    | 0.0977       | 0.1071          |
| MRE11A             | ATM - MRN DNA damage sensors           | 0.2121                  | 0.04879  | 4      | 7.697           | 46.3    | 0.0503       | 0.0713          | 8.425            | 88.6    | 0.0026       | <b>0.0040</b>   |
| NBN                | ATM - MRN DNA damage sensors           | -0.04222                | 0.6977   | 1      | 9.129           | 9.3     | 0.0034       | <b>0.0179</b>   | 10.39            | 79.7    | 0.0175       | <b>0.0225</b>   |
| RAD50              | ATM - MRN DNA damage sensors           | -0.2698                 | 0.01162  | 1      | 9.881           | 22.2    | 0.0193       | <b>0.0419</b>   | 10.93            | 75.9    | 0.0097       | <b>0.0135</b>   |
| BRCA1              | ATM/ATR pathways mediators             | 0.642                   | 3.49E-11 | 3      | 7.582           | 83.3    | 0.0060       | <b>0.0234</b>   | 6.558            | 53.2    | 9.16E-06     | <b>2.15E-05</b> |
| CLSPN              | ATM/ATR pathways mediators             | 0.7709                  | 0        | 3      | 3.101           | 42.6    | 0.2338       | 0.2427          | 5.216            | 79.7    | 3.17E-10     | <b>2.54E-09</b> |
| TIMELESS           | ATM/ATR pathways mediators             | 0.6557                  | 9.78E-12 | 3      | 9.175           | 48.1    | 0.2204       | 0.2306          | 10.03            | 79.7    | 6.22E-15     | <b>4.23E-13</b> |
| TIPIN              | ATM/ATR pathways mediators             | 0.1816                  | 0.09256  | 4      | 5.981           | 40.7    | 0.2053       | 0.2181          | 6.53             | 70.9    | 0.0054       | <b>0.0077</b>   |
| TOPBP1             | ATM/ATR pathways mediators             | 0.4434                  | 1.88E-05 | 4      | 8.456           | 24.1    | 0.0435       | 0.0644          | 8.661            | 32.9    | 0.0016       | <b>0.0027</b>   |
| CHEK1              | ATM and ATR pathways regulated kinases | 0.6022                  | 1.00E-09 | 3      | 7.724           | 85.2    | 4.35E-07     | <b>2.96E-05</b> | 7.784            | 79.7    | 3.27E-06     | <b>9.26E-06</b> |
| CHEK2              | ATM and ATR pathways regulated kinases | 0.642                   | 3.49E-11 | 3      | 7.582           | 77.8    | 0.0060       | <b>0.0234</b>   | 6.558            | 45.6    | 9.16E-06     | <b>2.15E-05</b> |
| H2AFX              | ATM and ATR pathways effector          | 0.5574                  | 2.69E-08 | 3      | 10.27           | 85.2    | 0.0111       | <b>0.0352</b>   | 10.3             | 72.2    | 1.11E-16     | <b>1.51E-14</b> |
| TP53               | ATM and ATR pathways effector          | -0.06086                | 0.5754   | 1      | 10.02           | 79.6    | 0.0002       | <b>0.0040</b>   | 10.13            | 84.8    | 0.0019       | <b>0.0032</b>   |
| MDC1               | ATM and ATR pathways effector          | 0.4496                  | 1.39E-05 | 4      | 8.99            | 44.4    | 0.0142       | <b>0.0357</b>   | 8.658            | 22.8    | 0.0044       | <b>0.0064</b>   |
| TP53BP1            | ATM and ATR pathways effector          | -0.09276                | 0.3927   | 1      | 9.333           | 11.1    | 0.1691       | 0.1855          | 10.16            | 57.0    | 0.0168       | <b>0.0217</b>   |

| Stalled forks restart by remodelling / DSB repair |                                                             | Correlation with MKI-67 |          |        | Time to relapse |         |              |               | Overall Survival |         |              |                 |
|---------------------------------------------------|-------------------------------------------------------------|-------------------------|----------|--------|-----------------|---------|--------------|---------------|------------------|---------|--------------|-----------------|
| Gene                                              | Cellular process                                            | Correl. Coef            | P-value  | Cutoff | Percentile      | P-value | Adj P-values | Cutoff        | Percentile       | P-value | Adj P-values |                 |
| BLM                                               | Helicase                                                    | 0.6556                  | 9.96E-12 | 3      | 5.692           | 87.0    | 0.1234       | 0.1399        | 5.692            | 68.4    | 1.33E-09     | <b>1.00E-08</b> |
| BRIP1                                             | Helicase                                                    | 0.581                   | 5.06E-09 | 3      | 3.968           | 22.2    | 0.2589       | 0.2647        | 5.658            | 72.2    | 0.0032       | <b>0.0049</b>   |
| FANCM                                             | Helicase                                                    | 0.4251                  | 4.41E-05 | 4      | 7.034           | 61.1    | 0.0030       | <b>0.0168</b> | 7.204            | 67.1    | 0.0003       | <b>0.0006</b>   |
| SMARCA1                                           | Helicase                                                    | 0.146                   | 0.1773   | 2      | 8.843           | 35.2    | 0.0205       | <b>0.0428</b> | 9.37             | 81.0    | 0.0152       | <b>0.0200</b>   |
| WRN                                               | Helicase                                                    | 0.118                   | 0.2763   | 2      | 8.697           | 83.3    | 0.0303       | 0.0529        | 7.163            | 13.9    | 0.3214       | 0.3214          |
| EXO1                                              | Exonuclease / Recruitment to DSBs                           | 0.8979                  | 0        | 3      | 4.96            | 46.3    | 0.0017       | <b>0.0125</b> | 7.003            | 72.2    | 7.86E-13     | <b>2.14E-11</b> |
| BRCA2                                             | Recruitment to DSBs                                         | 0.6932                  | 0.0000   | 3      | 3.64            | 18.5    | 0.0850       | 0.1041        | 5.991            | 69.6    | 1.23E-06     | <b>3.90E-06</b> |
| FANCD2                                            | Recruitment to DSBs                                         | 0.635                   | 0.0000   | 3      | 7.814           | 87.0    | 0.0111       | <b>0.0352</b> | 7.431            | 63.3    | 1.85E-08     | <b>8.69E-08</b> |
| RAD51                                             | Recruitment to DSBs                                         | 0.8551                  | 0        | 3      | 4.375           | 37.0    | 0.0028       | <b>0.0164</b> | 6.877            | 75.9    | 1.72E-10     | <b>1.56E-09</b> |
| RAD51C                                            | Recruitment to DSBs                                         | 0.271                   | 0.0113   | 4      | 7.916           | 37.0    | 0.0429       | 0.0644        | 8.124            | 58.2    | 0.0016       | <b>0.0027</b>   |
| RAD51L3                                           | Recruitment to DSBs                                         | 0.2801                  | 0.0087   | 4      | 7.396           | 87.0    | 0.0523       | 0.0731        | 7.465            | 82.3    | 0.0071       | <b>0.0099</b>   |
| RMI2                                              | Recruitment to DSBs                                         | 0.6815                  | 7.53E-13 | 3      | 7.648           | 38.9    | 0.0006       | <b>0.0069</b> | 8.75             | 59.5    | 2.54E-09     | <b>1.73E-08</b> |
| XRCC2                                             | Recruitment to DSBs                                         | 0.6583                  | 7.65E-12 | 3      | 4.88            | 42.6    | 0.2102       | 0.2216        | 5.494            | 68.4    | 3.63E-06     | <b>1.01E-05</b> |
| MCM8                                              | Interstrand crosslink repair                                | 0.2491                  | 0.0202   | 4      | 7.916           | 63.0    | 0.1046       | 0.1205        | 8.631            | 87.3    | 0.0034       | <b>0.0051</b>   |
| MCM9                                              | Interstrand crosslink repair                                | -0.2139                 | 0.0468   | 1      | 3.633           | 14.8    | 0.0289       | 0.0522        | 5.356            | 86.1    | 0.0300       | <b>0.0364</b>   |
| PARP1                                             | Interstrand crosslink repair                                | 0.3815                  | 0.0003   | 4      | 10.26           | 20.4    | 0.0433       | 0.0644        | 11.14            | 67.1    | 7.65E-07     | <b>2.48E-06</b> |
| RMI1                                              | Interstrand crosslink repair                                | 0.2378                  | 0.0267   | 2      | 9.486           | 77.8    | 0.0082       | <b>0.0293</b> | 9.164            | 64.6    | 0.0322       | <b>0.0387</b>   |
| TOP3A                                             | DNA end processing by MRE11                                 | 0.2494                  | 0.0200   | 4      | 8.308           | 24.1    | 0.0788       | 0.1002        | 9.098            | 86.1    | 0.0034       | <b>0.0051</b>   |
| GEN1                                              | Holliday junction dissolution                               | 0.4515                  | 1.27E-05 | 3      | 8.202           | 85.2    | 0.2007       | 0.2149        | 8.259            | 79.7    | 4.72E-06     | <b>1.26E-05</b> |
| XRCC3                                             | Holliday junction dissolution                               | 0.5689                  | 1.21E-08 | 3      | 7.472           | 55.6    | 0.0897       | 0.1060        | 7.874            | 64.6    | 6.29E-08     | <b>2.59E-07</b> |
| MUS81                                             | Holliday junction resolution                                | 0.1526                  | 0.1582   | 4      | 8.886           | 66.7    | 0.0834       | 0.1040        | 8.951            | 59.5    | 4.94E-06     | <b>1.27E-05</b> |
| EME1                                              | Holliday junction resolution                                | 0.6979                  | 1.28E-13 | 3      | 4.216           | 29.6    | 0.0245       | <b>0.0490</b> | 5.389            | 60.8    | 5.75E-09     | <b>3.56E-08</b> |
| FAN1                                              | Holliday junction resolution / Interstrand crosslink repair | -0.08815                | 0.4167   | 1      | 9.192           | 83.3    | 0.0708       | 0.0926        | 8.769            | 51.9    | 0.09213984   | 0.1018782       |

| dNTP synthesis |                          | Correlation with MKI-67 |          |        | Time to relapse |         |              |               | Overall Survival |         |              |                 |
|----------------|--------------------------|-------------------------|----------|--------|-----------------|---------|--------------|---------------|------------------|---------|--------------|-----------------|
| Gene           | Cellular process         | Correl. Coef            | P-value  | Cutoff | Percentile      | P-value | Adj P-values | Cutoff        | Percentile       | P-value | Adj P-values |                 |
| RRM1           | Ribonucleotide reductase | 0.5658                  | 1.50E-08 | 4      | 10.1            | 63      | 0.0292       | 0.0522        | 10.3             | 60.7    | 2.51E-07     | <b>8.53E-07</b> |
| RRM2           | Ribonucleotide reductase | 0.9112                  | 0        | 3      | 6.59            | 40.7    | 0.0124       | <b>0.0352</b> | 9.619            | 78.5    | 7.69E-12     | <b>9.51E-11</b> |
| RRM2B          | Ribonucleotide reductase | -0.1183                 | 0.2751   | 1      | 10.89           | 70.4    | 0.0296       | 0.0523        | 9.512            | 17.8    | 0.0004       | <b>0.0007</b>   |

|       |                                 |   |   |   |       |      |        |               |       |      |          |                 |
|-------|---------------------------------|---|---|---|-------|------|--------|---------------|-------|------|----------|-----------------|
| MKI67 | Indicator of cell proliferation | - | - | 3 | 6.762 | 31.5 | 0.0134 | <b>0.0353</b> | 9.709 | 70.9 | 1.54E-13 | <b>5.25E-12</b> |
|-------|---------------------------------|---|---|---|-------|------|--------|---------------|-------|------|----------|-----------------|
